# Supplementary material for: Luminescence and energy transfer of 432 nm blue LED radiation-converting phosphor Ca4Y6O(SiO4)6:Eu2+, Mn2+ for warm white LEDs
Source: Royal Society of Chemistry journal article supplement (doi:10.1039/c4ra08283d), 2014-11-27
Supplement: c4ra08283d1.pdf [file c4ra08283d1.pdf]

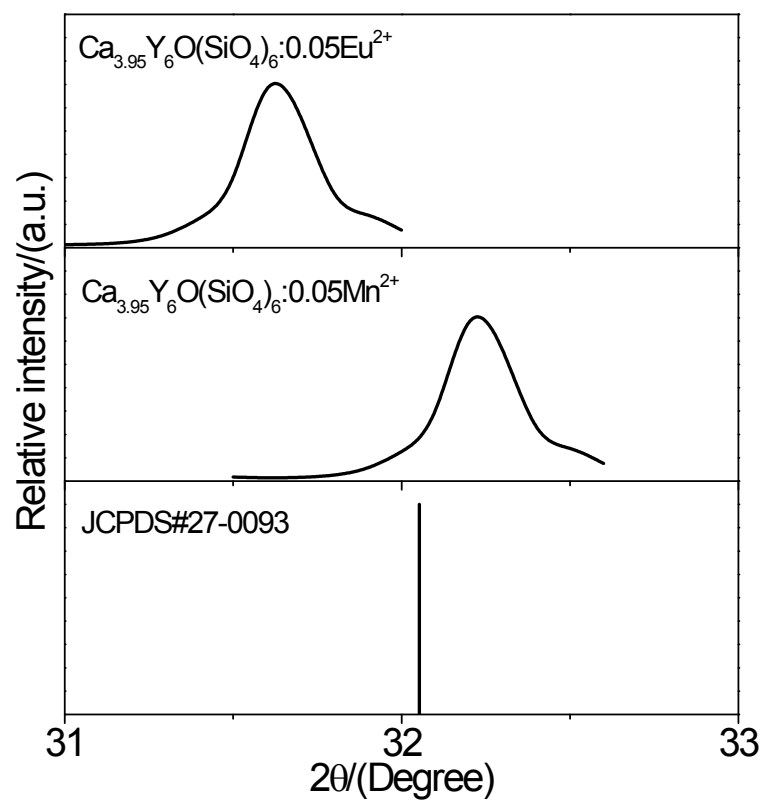

Fig.S1. Enlarged diffraction peak at  $2\theta=31\text{-}33^\circ$ .

Table S1. CIE chromaticity coordinates (X, Y) and CCT (K) of white LEDs under different current.

| Current (mA) | CIE coordinates (X, Y) | CCT (K) |
|--------------|------------------------|---------|
| 20           | (0.336, 0.319)         | 4326    |
| 50           | (0.337, 0.319)         | 4339    |
| 100          | (0.337, 0.321)         | 4356    |
| 150          | (0.339, 0.321)         | 4416    |
| 200          | (0.339, 0.323)         | 4493    |
